# Supplementary material
Source: PubMed Central journal article supplement (PMC5837916)
Supplement: NIHMS925595-supplement-Supp_info.pdf [file NIHMS925595-supplement-Supp_info.pdf]

**Supplementary Table 1.** Primers used to clone N-*AaKr-h1* and C-*AaKr-h1* in pGEX-6P-1.

| Plasmid        | Primer | Sequence (5'-3')         |
|----------------|--------|--------------------------|
| NKrh-pGEX-6P-1 | Fwd    | CGCGGATCCATGGTCTACTACACG |
|                | Rev    | CCGCTCGAGTCAAACAGACTGTTC |
| CKrh-pGEX-6P-1 | Fwd    | CGCGGATCCGAAATCCCGGATGAA |
|                | Rev    | CCGCTCGAGTCACGACGCCTTGG  |

**Supplementary Table 2.** Primers used in qRT-qPCR

| Gene              | Primer | Sequence (5'-3')           |
|-------------------|--------|----------------------------|
| <i>AAEL004444</i> | Fwd    | AGCAGATCACACCGTAGTGC       |
|                   | Rev    | TGAAATTGCAGGGTTGTTGT       |
| <i>AAEL005957</i> | Fwd    | CATACCATTTCATGGCACGTT      |
|                   | Rev    | GGACGTTCCATAGCACACAC       |
| <i>AAEL005810</i> | Fwd    | AAAGATCCGATCGGTCAAAC       |
|                   | Rev    | AGATGAGCGTCTTGTGACG        |
| <i>AAEL005545</i> | Fwd    | GCGGCGTCAATAACTATCAA       |
|                   | Rev    | GTGTTGAATGGAACGCACTC       |
| <i>AAEL013177</i> | Fwd    | GACGAGCACAACTGATGAT        |
|                   | Rev    | GTTTCCACCAGAAGACCCAT       |
| <i>AAEL014226</i> | Fwd    | GTGCCTTTGTTTCAGGACTCA      |
|                   | Rev    | GACGGTAATGGAGGTGGAGT       |
| <i>AarpS7</i>     | Fwd    | TCAGTGTACAAGAAGCTGACCGGA   |
|                   | Rev    | TTCCGCGCGCGCTCACTTATTAGATT |
| <i>AaKr-h1</i>    | Fwd    | TTCTCGCAACAACAGCAACATCCG   |
|                   | Rev    | TCATCAGATCCATTGACGCTGGGT   |
| <i>AaVg</i>       | Fwd    | GCAGGAATGTGTCAAGCGTGA      |
|                   | Rev    | ACGAGGACGAAGAATCGGAAG      |

**Supplementary Table 3.** Primers for making DNA templates to synthesize dsRNAs.

| Gene           | Primer | Sequence (5'-3')                                |
|----------------|--------|-------------------------------------------------|
| <i>AaKr-h1</i> | Fwd    | TAATACGACTCACTATAGGGAGTAATGACCTCAAATGGTGCAGATCG |
|                | Rev    | TAATACGACTCACTATAGGGAGGCCTTGGCGTACTGAATGACGGAG  |
| <i>GFP</i>     | Fwd    | TAATACGACTCACTATAGGGAGACGTAAACGGCCACAAGTTC      |
|                | Rev    | TAATACGACTCACTATAGGGAGTGCTCAGGTAGTGGTTGTCG      |
| <i>AaMet</i>   | Fwd    | TAATACGACTCACTATAGGGGCTGTTAAAAGTGGATGATGATAC    |
|                | Rev    | TAATACGACTCACTATAGGGAATCGGCACCTTGGTAGAACGATC    |

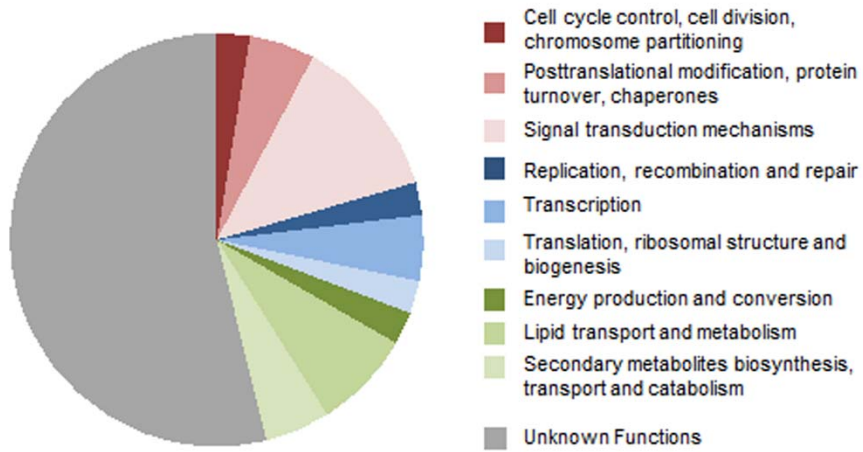

**Supplementary Figure 1.** Clusters of Orthologous Groups functional assignments for the identified AaKr-h1 target genes.

## A.

### Sequences homologous to the KBS of the *BmBR-C* gene

| <b>Locus of Cloned Fragment</b> | <b>Strand</b> | <b>Possible KBS</b> |
|---------------------------------|---------------|---------------------|
| supercont1.1044:164199-164352   | +             | TATGCACCGCAA        |
| supercont1.107:238744-239418    | +             | AACCTACGACGA        |
| supercont1.11:2072323-2073246   | +             | GACCAAACCAAA        |
| supercont1.1131:133448-133780   | -             | AAGCTGCAGCAA        |
| supercont1.119:81050-81549      | -             | AACCTAGCCCGA        |
| supercont1.122:2162654-2163511  | +             | GACCTACGCCGA        |
| supercont1.123:427346-427574    | -             | TAGCTTTGTCAA        |
| supercont1.15:19197-19725       | +             | AAACTACACCAC        |
| supercont1.15:4020480-4021282   | +             | GTCCTATCTGAA        |
| supercont1.162:628545-629795    | +             | TGGCTGCCCTAA        |
| supercont1.168:920752-920920    | +             | GACGTGCTTCAT        |
| supercont1.175:567643-568161    | +             | AACATATCCAAA        |
| supercont1.175:275807-276101    | +             | TACATACCTCAA        |
| supercont1.179:1278338-1278612  | +             | AACCTTTCCCAT        |
| supercont1.182:1219257-1220096  | -             | GAACCTTAAACAA       |
| supercont1.201:1048528-1049084  | -             | AACCTTTGGCAA        |
| supercont1.204:795129-795831    | -             | GAGCTGGCGCAT        |
| supercont1.21:600701-601222     | -             | AACATTTCGTCAA       |
| supercont1.221:351203-352060    | -             | AAGCTTGCAGCAA       |
| supercont1.248:1494624-1495531  | -             | GGCCTTCCTTAG        |
| supercont1.271:313573-314220    | -             | TAACCTTCGTCAA       |
| supercont1.283:193494-193644    | -             | TACCGGTTCCAA        |
| supercont1.284:490057-490399    | -             | GAGCTGTGCAAA        |
| supercont1.297:121175-121372    | -             | GATCTTTGCCAA        |
| supercont1.383:1005986-1006368  | -             | GATTTATCACAA        |
| supercont1.454:393982-394164    | +             | AGCTTTCCGGAA        |
| supercont1.50:2047109-2047800   | -             | GAAATGCCGCAC        |
| supercont1.500:57637-58530      | -             | TTCCTATCACAA        |
| supercont1.536:203408-204079    | +             | AAACTAACTCAA        |
| supercont1.545:535344-536084    | +             | GAGCTTTTCCAA        |
| supercont1.55:1040026-1040168   | +             | ATGCTACCTGAA        |
| supercont1.638:463831-463996    | -             | CACCTTCTCCAA        |
| supercont1.65:2535172-2536115   | -             | GACCATCTCTAA        |
| supercont1.678:83033-83183      | -             | AGCCTATATCAA        |
| supercont1.73:993813-993954     | +             | AACCAATCCCGA        |
| supercont1.76:2041931-2042480   | -             | AACCTATTGCAA        |
| supercont1.76:62379-63323       | -             | GACCTACCACCC        |
| supercont1.801:206028-206193    | -             | ACCCTTCTCCAA        |
| supercont1.840:185133-186485    | -             | GATCTTTCGGCAA       |

B.

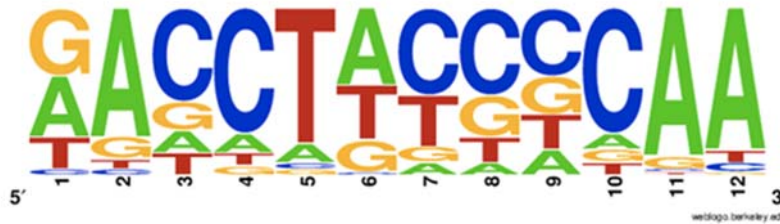

KBS of *BmBR-C*

5' GACCTACGCTAA CGCTAAATAGAGTTCCGA 3'

**Supplementary Figure 2.** Potential Kr-h1 binding sequences in the regulatory regions of the identified Kr-h1 target genes. To define the consensus binding site for AaKr-h1 in the sequences isolated by ChIP-cloning, we performed pairwise-alignments with a 12-bp core sequence (GACCTACGCTAA) of the Kr-h1 binding site (KBS) in the *Bombyx mori Broad-Complex* gene. (A) The top-ranked homologous sequences were listed and extracted for motif analysis using WebLogo (<http://weblogo.berkeley.edu>). (B) Comparison of the consensus motif with the KBS of *BmBR-C*.

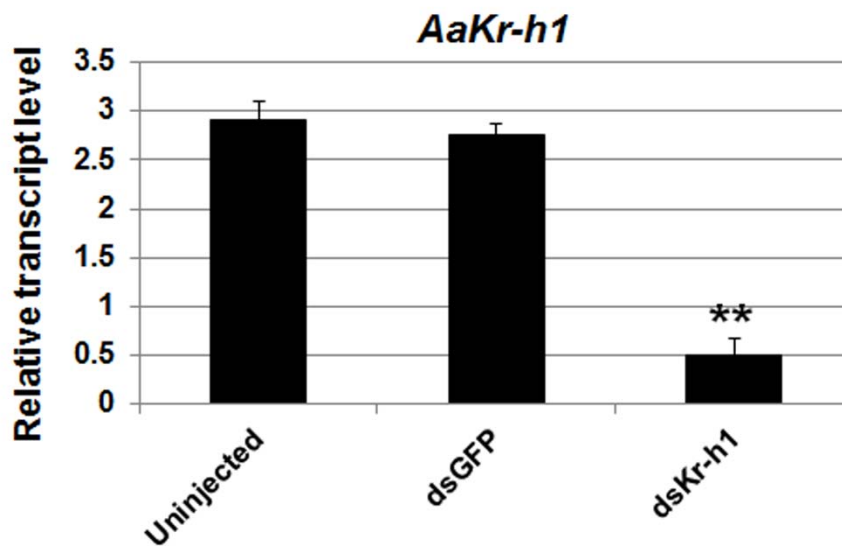

**Supplementary Figure 3.** *AaKr-h1* was successfully knocked down in *dsKr-h1* injected mosquitoes. Total RNA was extracted from the un-injected, *dsGFP*- and *dsKr-h1*-injected mosquitoes at 4 days after dsRNA injection. The mRNA levels of *AaKr-h1* were measured by real-time PCR. Results are the mean  $\pm$  S.D. of three replicates. Statistical analysis was conducted by a paired t-test (\*\*,  $p < 0.01$ ).
